# Supplementary material
Source: Springer Nature journal article supplement (https://www.springermedizin.de/resource/supplementary/12982_2007_53_MOESM28_ESM.pdf/9604370)
Supplement: MOESM28 [file 9604370]

Thai / ภาษาไทย

บทบรรณาธิการ

บุคคลที่ไม่ได้ใช้ภาษาอังกฤษในการสื่อสาร ก็สามารถใช้ **Open Access** ในการรับรู้ข้อมูลต่างๆได้

ผู้เขียน: Isaac Chun-Hai FUNG

บทคัดย่อ

บรรณาธิการเน้นให้เห็นถึงปัญหาของภาษาในการสื่อสารทางวิทยาศาสตร์ ถึงแม้ว่า **Open Access** จากสื่อต่างๆจะประสบความสำเร็จอย่างมาก 4 แนวทางแนะนำสำหรับวารสารภาษาอังกฤษในการแก้ไขปัญหของภาษาในการสื่อสาร คือ: 1) การเตรียมคำนำ ในภาษาอื่นๆ โดยผู้เขียน 2) การใช้ระบบ Wiki ในการแปลจากภาษาหนึ่งไปยังอีกภาษาหนึ่ง 3) การจัดตั้งคณะกรรมการกลุ่มล่ามและบรรณาธิการนานาชาติ 4) การจัดภาษาเลือกให้แก่วารสารนั้นๆ กลุ่มวารสาร **Emerging Themes in Epidemiology** ได้ประกาศว่านับแต่นี้ไป ทางกลุ่มจะจัดตั้งข้อมูลที่เป็นคำนำ และเนื้อหาที่ได้รับการแปลจากผู้เขียนแล้ว ให้เป็นข้อมูลเสริมของระบบ
